# Supplementary material for: Immobilized WNT Proteins Act as a Stem Cell Niche for Tissue Engineering
Source: PubMed Central journal article supplement (PMC4944585; doi:10.1016/j.stemcr.2016.06.004), 2016-07-12

**Stem Cell Reports, Volume 7**

**Supplemental Information**

**Immobilized WNT Proteins Act as a Stem Cell Niche for Tissue Engineering**

**Molly Lowndes, Michael Rotherham, Joshua C. Price, Alicia J. El Haj, and Shukry J. Habib**

1 **Supplemental Figures**

2

3 **Supplementary Figure 1. Long-term storage controls with Comma- $\beta$ -Geo cells**  
4 **and mESCs, Related to Figure 2**

5 (A) Comma-D $\beta$ -Geo cells seeded onto surfaces immobilized with WNT3A or vehicle.  
6 Surfaces were freshly printed or printed then dehydrated and stored at 4°C for 4  
7 months before cell seeding. After 24hrs the number of GFP+ cells per condition  
8 determined, summarized in table (below)

9 (B) Comma-D $\beta$ -Geo cells seeded onto freshly immobilized WNT3A/vehicle or  
10 immobilized WNT3A surfaces incubated at 37°C for 7hrs +/- serum. Table below  
11 summarizes number of GFP+ cells per condition. The non-bound WNT fractions  
12 (from freshly printed or after incubation at 37°C for 7hrs +/- serum) were added to  
13 Comma-D $\beta$ -Geo cells seeded onto vehicle surfaces (right).

14 (C) Representative images of GFP and mCherry expression of Comma-D $\beta$ -Geo cells  
15 seeded onto freshly immobilized WNT3A or vehicle surfaces and visualized after  
16 144hrs.

17 (D) Representative GFP images of Comma-D $\beta$ -Geo cells seeded onto surfaces  
18 immobilized with vehicle or WNT3A. An image taken every 24hrs for up to 168hrs  
19 and medium was changed every other day. (i) Cells seeded onto vehicle surface. (ii)  
20 Cells seeded onto WNT3A surface. (iii) Cells seeded onto vehicle surface after  
21 being grown on WNT3A surface for 24hrs. (iv) Cells seeded onto vehicle surface  
22 with soluble WNT3A added the first day to the medium. The original medium was  
23 kept and further supplemented with a fresh medium without WNT3A (final volume of  
24 200  $\mu$ l) to keep samples from drying out (v) Cells seeded onto vehicle surface alone

25 after being grown for 24hrs on vehicle surface with soluble WNT3A supplemented  
26 medium.

27 (E) Percent GFP<sup>+</sup> cells on immobilized surfaces stored at 4°C for 14 days (WNT3A ±  
28 DTT) determined using automated protocol generated in Volocity software; based on  
29 finding overlap of mCherry and GFP objects. (two independent experiments, mean ±  
30 SD; statistical significance determined with one-way ANOVA, p values correspond to  
31 \* $<0.05$ ).

32 (F) The number of GFP<sup>+</sup> objects/ESC cell cluster was monitored every 24hrs and  
33 upon passaging onto freshly immobilized surfaces. The number of GFP<sup>+</sup> objects per  
34 cell cluster was significantly different between the two surfaces, (two independent  
35 experiments; statistical significance determined with a two-way ANOVA; p values  
36 correspond to \*\* $<0.01$ , \*\*\* $<0.001$ ).

37 The scale bar represents 50 μM.

38

39 **Supplementary Figure 2. FACS analysis of WNT responsiveness, Related to**  
40 **Figure 2**

41 FACS analysis of Comma Db-Geo (7x-GFP/SV-40mCherry) cells seeded onto  
42 different surfaces for 24hrs.

43 (A) All conditions were gated for cells (FSC-AxSSC-A), Live (FSC-WxDapi) and  
44 single cells (FSC-WxFSC-A).

45 (B) Control cells used for compensation controls.

46 (C) Comma Db-Geo (7x-GFP/SV-40mCherry) alone

47 (D) Comma Db-Geo (7x-GFP/SV-40mCherry) with soluble WNT3A (50ng/mL)

48 (E) Comma Db-Geo (7x-GFP/SV-40mCherry) seeded onto a BSA coated surface.

49 (F) Comma Db-Geo (7x-GFP/SV-40mCherry) seeded onto a DTT treated WNT3A  
50 surface.

51 (G) Comma Db-Geo (7x-GFP/SV-40mCherry) seeded onto a WNT3A surface.

52 Plots are split into 4 quadrants and a FITC-low population is highlighted based on  
53 control groups.

54

55 **Supplementary Figure 3. Additional analysis of marker expression for Comma**  
56 **D $\beta$ -Geo cells and mESCs, Related to Figure 3**

57 (A-F) Single cell fluorescence intensity measurements of Comma D $\beta$ -Geo cells for  
58 each marker [SCA1-APC (A and D), 7TCF-GFP (B and E) and SV40-mCherry (C  
59 and F)] were combined (three independent experiments) and plotted as a histogram  
60 (A-C) and Tukey box plot (D-F) (>1000 cells per experiment with outliers removed  
61 from each individual experiment, Q=0.1%). Statistically significant changes in  
62 intensity distributions between the two populations were determined using the  
63 Kruskal-Wallis test and the Kolmogorov-Smirnov D value is reported.

64 (G) The expression levels were split into 2-3 categories; corresponding percentages  
65 and number of cells analyzed are summarized in a table.

66 (H) After being grown for two days in ESC medium containing FBS +LIF mESCs on  
67 immobilized WNT3A  $\pm$  DTT or BSA surfaces (supplemented with 50ng/mL soluble  
68 WNT3A) ESCs were fixed and stained for alkaline phosphatase (P1) or trypsinized,  
69 collected and re-seeded onto freshly immobilized surfaces. After an additional two  
70 days the cells were fixed and stained with alkaline phosphatase and quantified (P2).  
71 (n=3 biological replicates; statistical significance determined with one-way ANOVA  
72 for just the ALP high percentages between surface treatments; p values correspond  
73 to \*<0.05, \*\*<0.01, \*\*\*<0.001)

74 (I) Representative brightfield and GFP images of Nanog-Venus mESCs grown on  
75 WNT3A surfaces (+/- DTT treatment) for 72 hrs. Fluorescence intensity determined  
76 using Volocity software and the number of colonies manually. Colonies not above  
77 threshold considered Nanog low while colonies above the threshold were considered  
78 Nanog high. Population percentages plotted as part of whole for each condition.  
79 Colony analysis showed 5% of the colonies on WNT3A DTT surfaces with high  
80 Nanog-Venus expression compared to WNT3A surfaces with 28% of the colonies  
81 with high Nanog-Venus expression.

82

83 **Supplementary Figure 4. Raw numbers and representative images of**  
84 **quantified data for hMSC 3D culture, Related to Figure 4**

85 (A) hMSCs cultured on the active WNT3A surfaces coated with collagen gel were  
86 stained for DAPI to determine cell number. Gels were imaged as z-stacks and the  
87 number of cells in each layer was counted: lower (up to 72 $\mu$ m / 46% gel), middle (up  
88 to 132 $\mu$ m, 85% gel) and upper layers (up to 179 $\mu$ m, 100% gel). Values represent  
89 average cell counts, error bars represent SEM, \* denotes  $p < 0.05$ .

90 (B) Representative fluorescent immunostaining images from each defined layer.  
91 Gels stained for STRO1 (green), Osteocalcin (red) and DAPI (blue) of hMSC in  
92 collagen gels after 7 days in culture on WNT3A  $\pm$  DTT. Merged images show spatial  
93 pattern of staining in relation to cell nuclei. Scale bar represents 100  $\mu$ m.

94 (C) Representative confocal images (4x magnification) of STRO1 staining at the  
95 base of the collagen gel (7 days in culture) in the middle of the well. The scale bar  
96 represents 500  $\mu$ m.

**A.**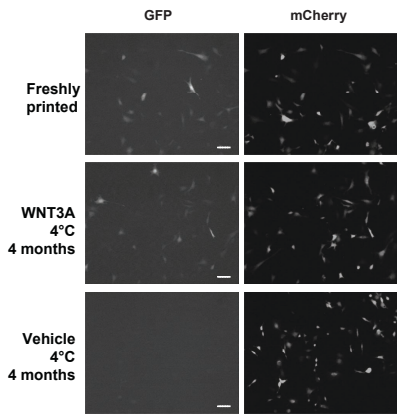

|                  | % GFP* (n) |
|------------------|------------|
| Freshly Printed  | 52% (93)   |
| 4 months WNT3A   | 51% (131)  |
| 4 months Vehicle | 0% (82)    |

**B.**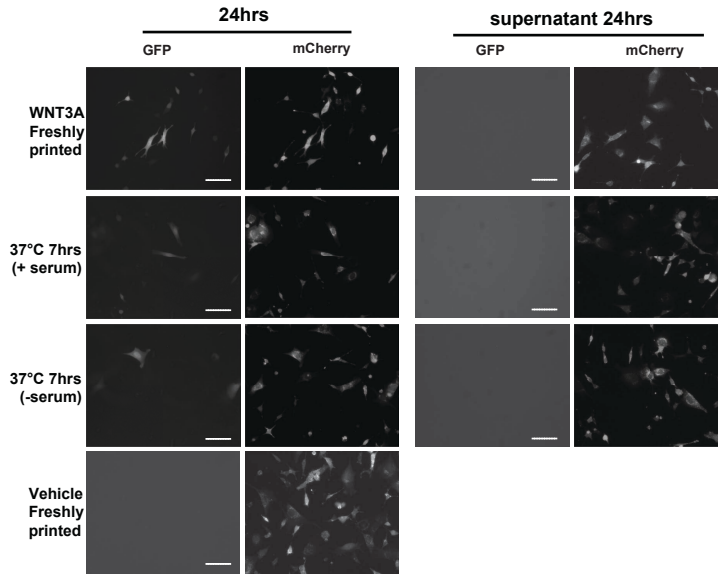

|                   | % GFP* (n) |
|-------------------|------------|
| Freshly Printed   | 54% (48)   |
| 37C 7hr (+ serum) | 34% (64)   |
| 37C 7hr (- serum) | 14% (58)   |

**C.**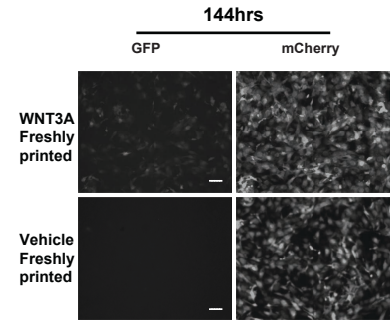**D.**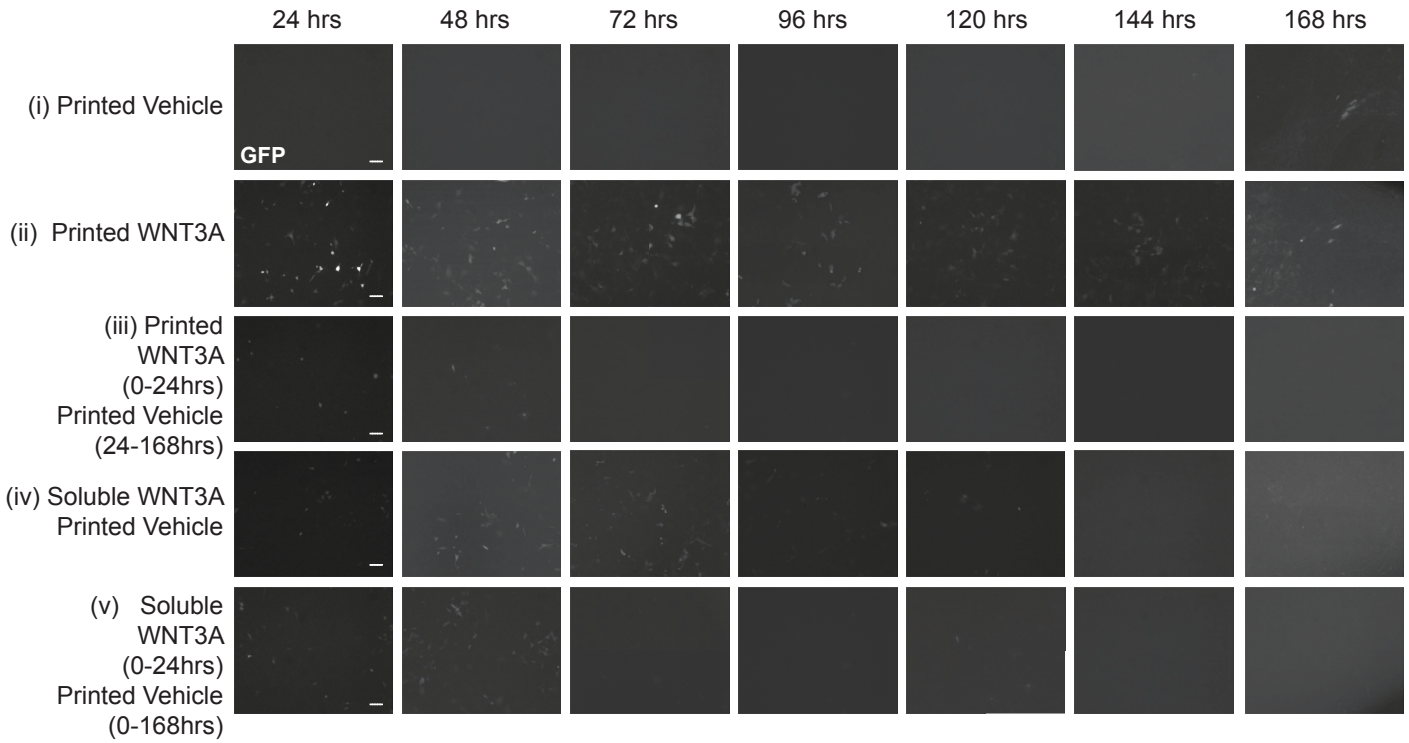**E.**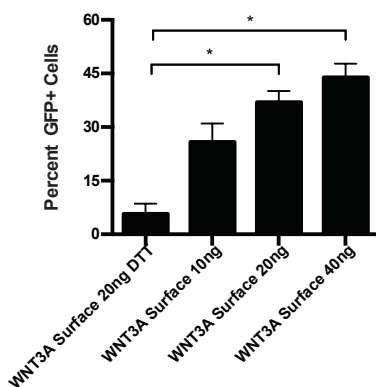**F.**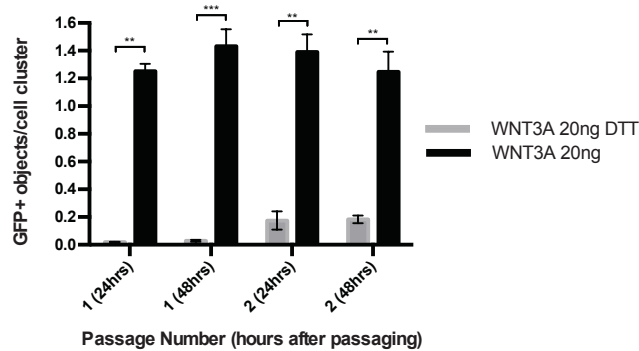

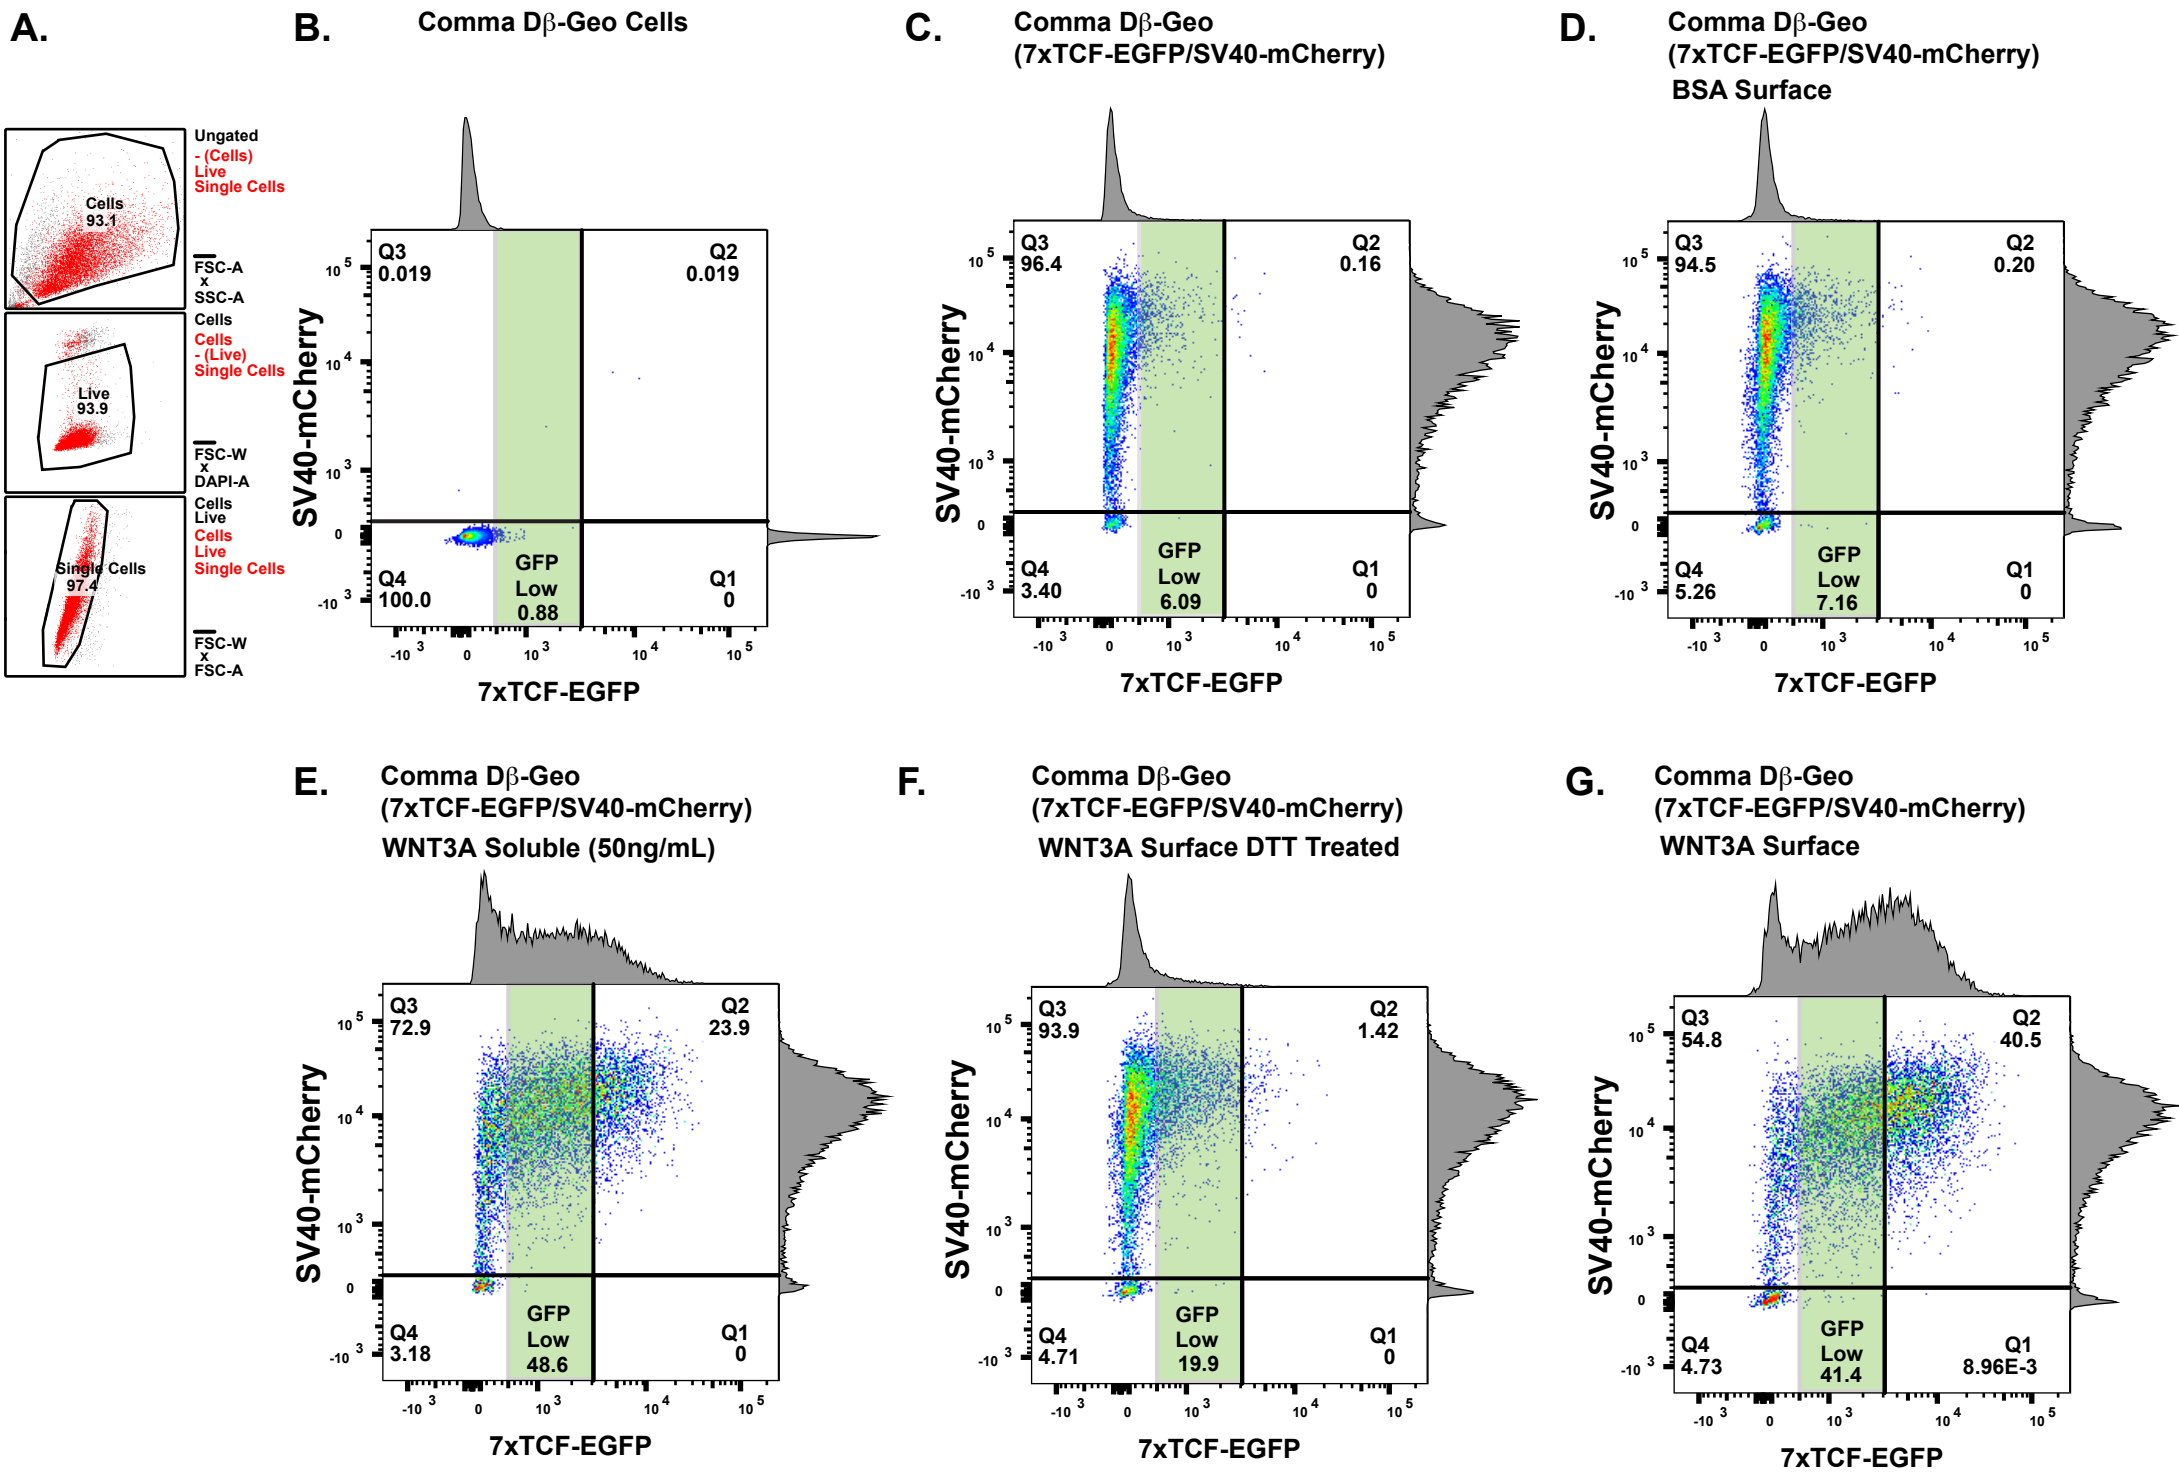

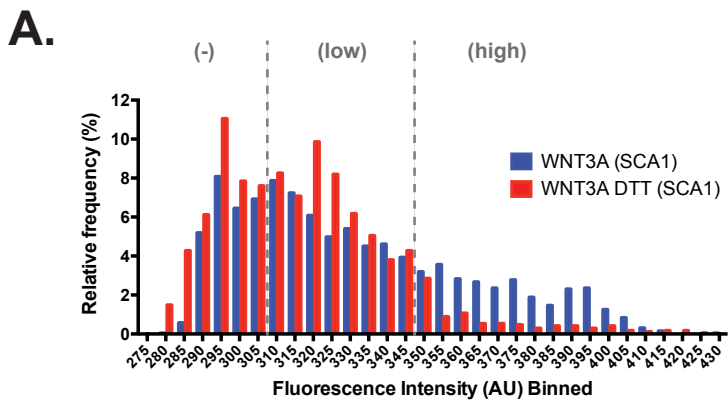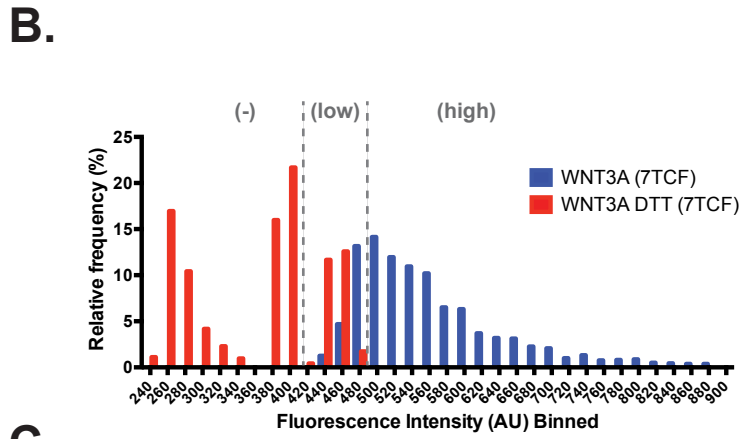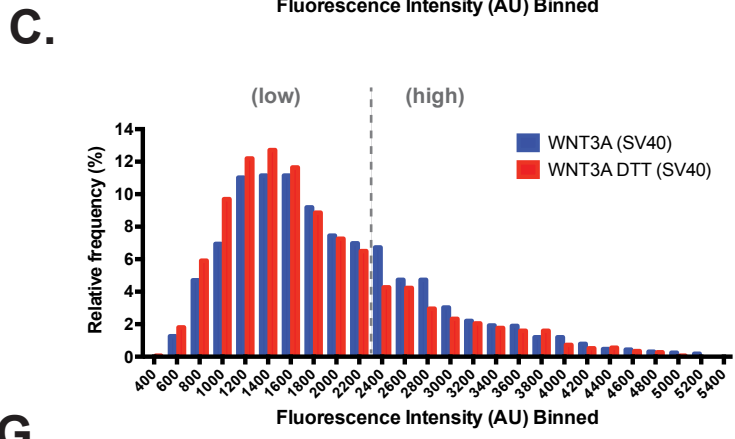

**G.**

|           | SCA1 (-) | SCA1 (low) | SCA1 (high) | n    |
|-----------|----------|------------|-------------|------|
| WNT3A DTT | 38%      | 53%        | 9%          | 1683 |
| WNT3A     | 27%      | 45%        | 28%         | 1906 |

|           | 7TCF (-) | 7TCF (low) | 7TCF (high) | n    |
|-----------|----------|------------|-------------|------|
| WNT3A DTT | 74%      | 26%        | 0%          | 1439 |
| WNT3A     | 0%       | 23%        | 77%         | 1597 |

|           | SV40 (low) | SV40 (high) | n    |
|-----------|------------|-------------|------|
| WNT3A DTT | 81%        | 19%         | 2877 |
| WNT3A     | 77%        | 23%         | 3166 |

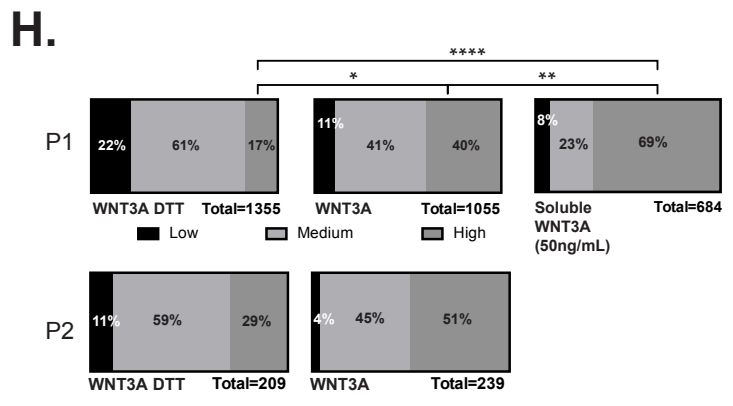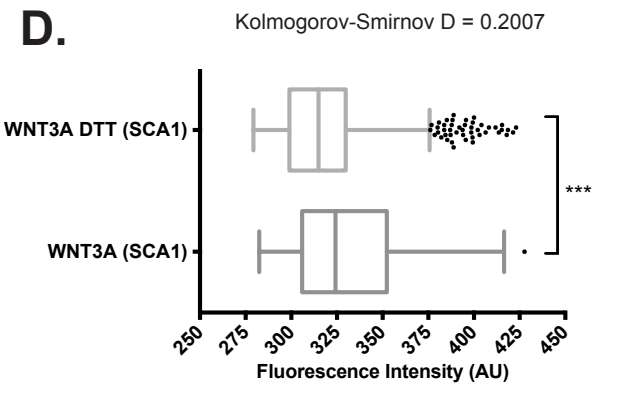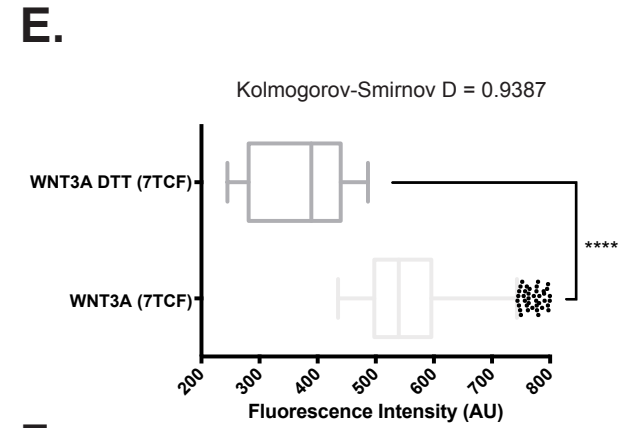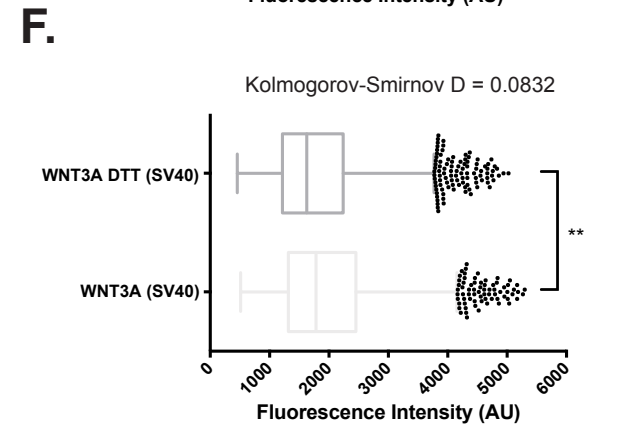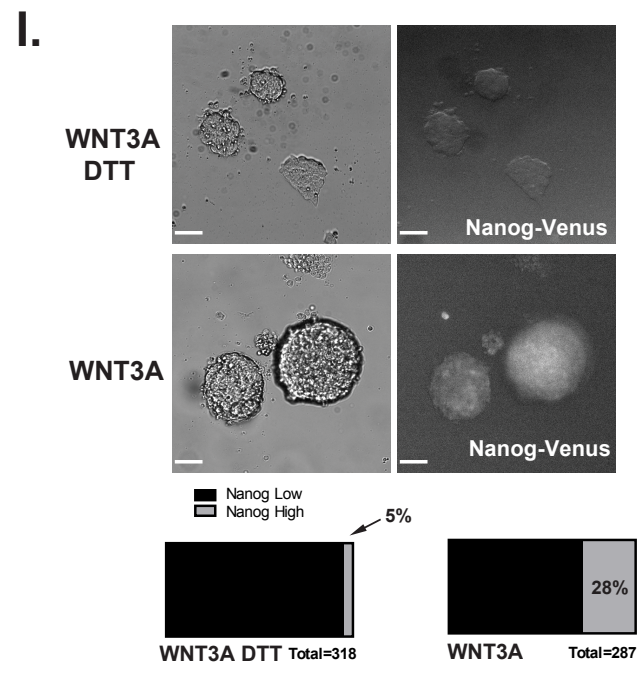



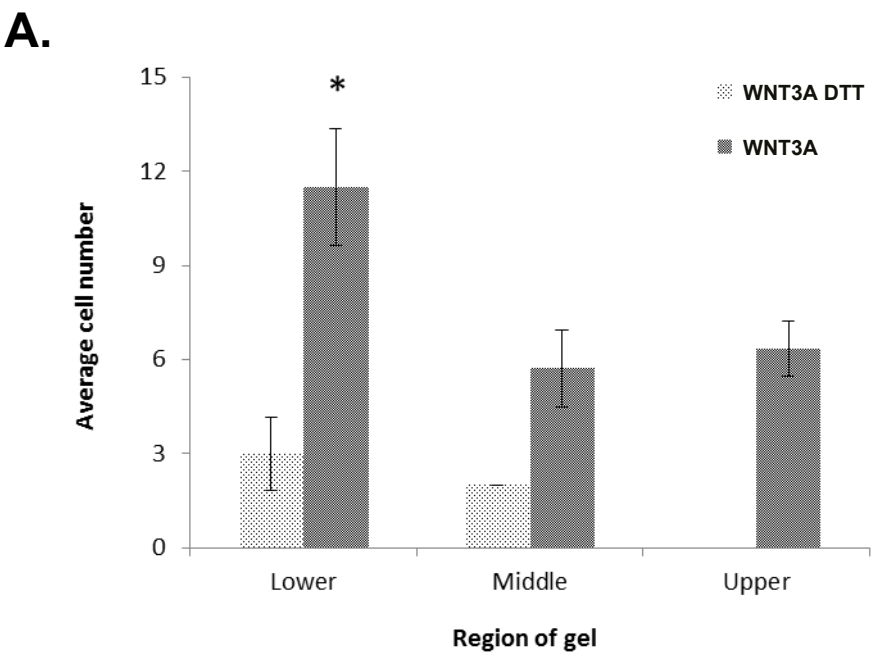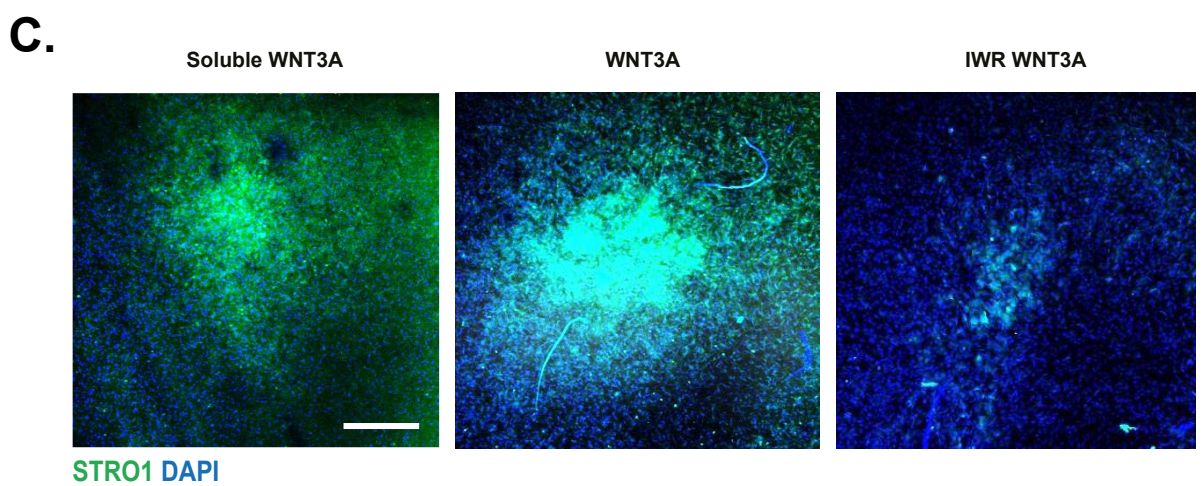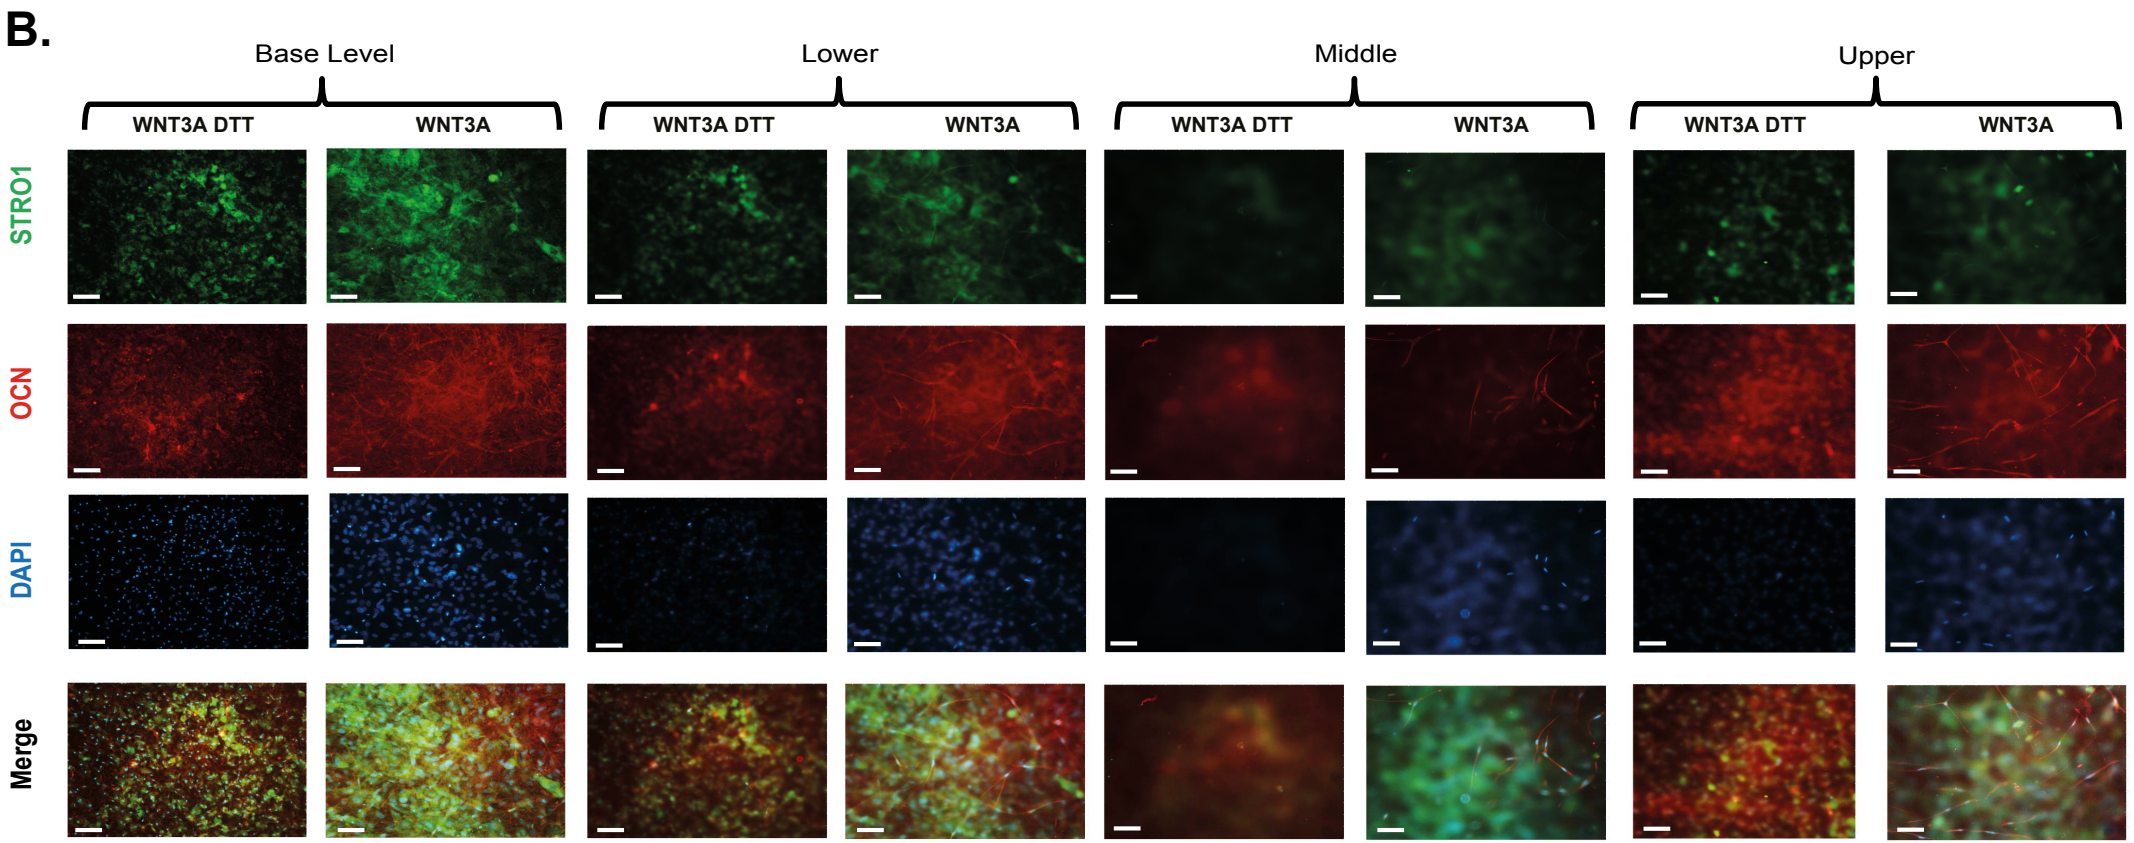

Supplement: mmc1.pdf [file mmc1.pdf]
